# Supplementary material for: Altering Brain Amyloidosis by Intra-Lingual and Extra-Nasal Exposure of Aβ Aggregates
Source: MDPI journal article supplement (doi:10.3390/cells11213442), 2022-10-31
Supplement: s1 [file s1]

**Supplemental Figure S1.**

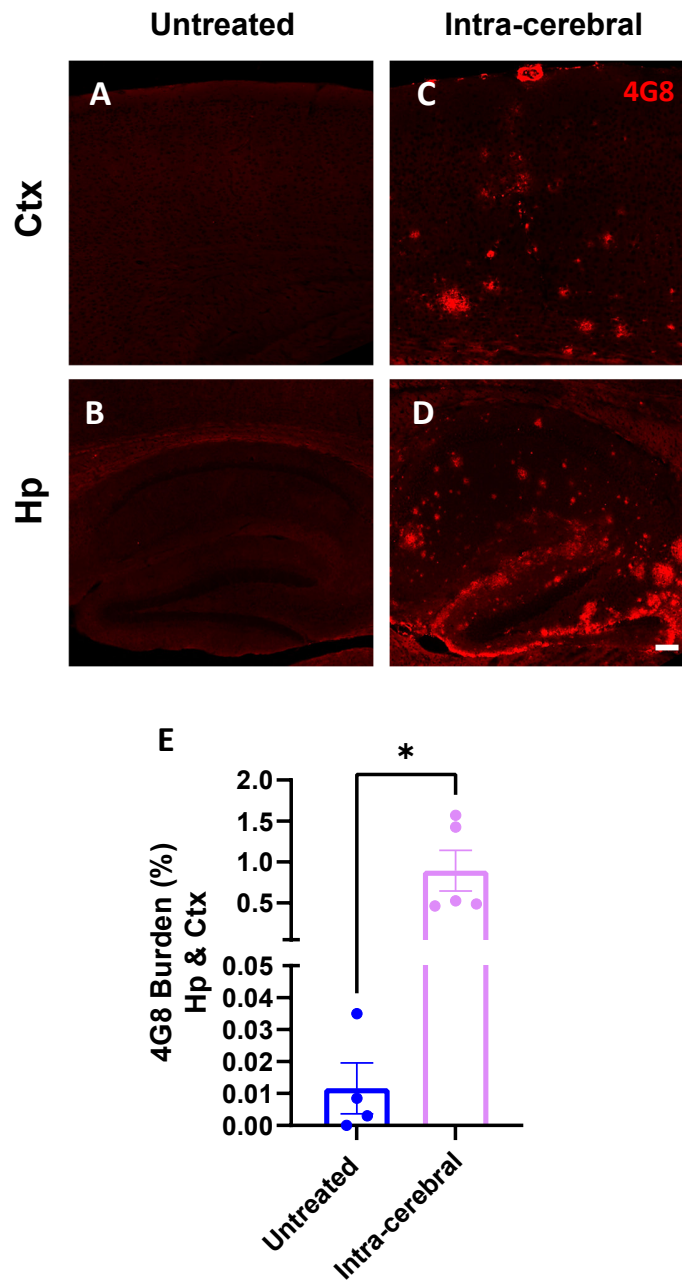

**Supplemental Figure S1.** Aβ seeding activity of the inoculum in Tg2576 animals after intra-cerebral injection. Representative pictures of 4G8 staining in cortex (A,C) and hippocampus (B,D) of

untreated, or intra-cerebrally injected Tg2576 mice. 4G8 burden (%) quantification in cortex and hippocampus (E) of untrated and intra-cerebrally challenged mice demonstrated the A $\beta$  seeding activity of the. Values are expressed as mean  $\pm$  SD. Statistical analyses were performed by independent samples t-test (\*p<0.05). Scale bar represents 100  $\mu$ m.

**Supplemental Figure S2.**

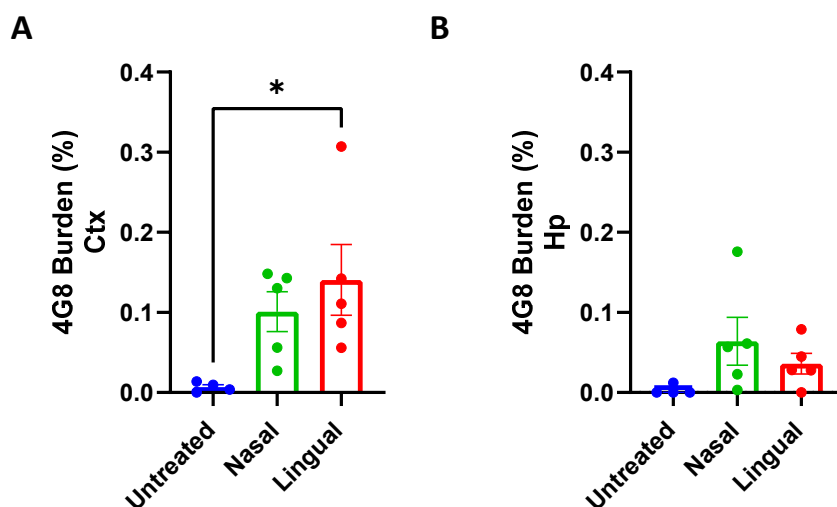

**Supplemental Figure S2. A $\beta$  burden in the cortex or hippocampus of experimental animals.**

4G8 burden (%) quantification in cortex (A) and hippocampus (B) of 300-day-old Tg2576 mice challenged with A $\beta$  seeds by the intra-lingual or extra-nasal routes. Representative pictures of these quantifications are displayed in Figure 2. One-way ANOVA and Tukey test (\*p<0.05).
